# Supplementary material
Source: Springer Nature journal article supplement (https://www.springermedizin.de/resource/supplementary/12911_2011_571_MOESM6_ESM.pdf/9526140)

**Accessibility of the  
healthcare  
professionals and the  
opportunity to  
exchange conceptions;  
exchange-ability**

The patient is  
partner in the  
dialogue

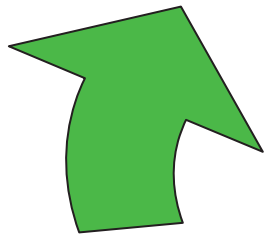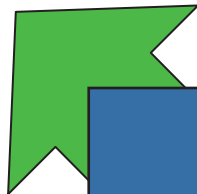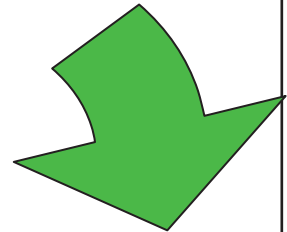

The patient use the  
health informatics  
tool to be active

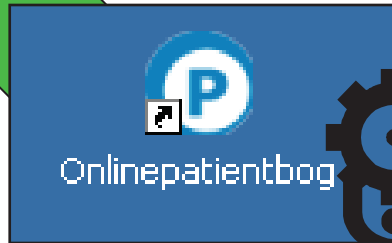

**Individualized  
information**

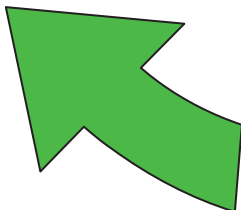

The patient is  
active in his  
own course

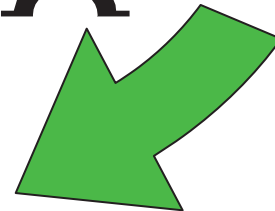

Supplement: MOESM6 [file 9526140]
